# Supplementary material for: Spectroscopic evidence for cofactor–substrate interaction in the radical-SAM enzyme TYW1
Source: Royal Society of Chemistry journal article supplement (doi:10.1039/c7dt00736a), 2017-01-01
Supplement: c7dt00736a1.pdf [file c7dt00736a1.pdf]

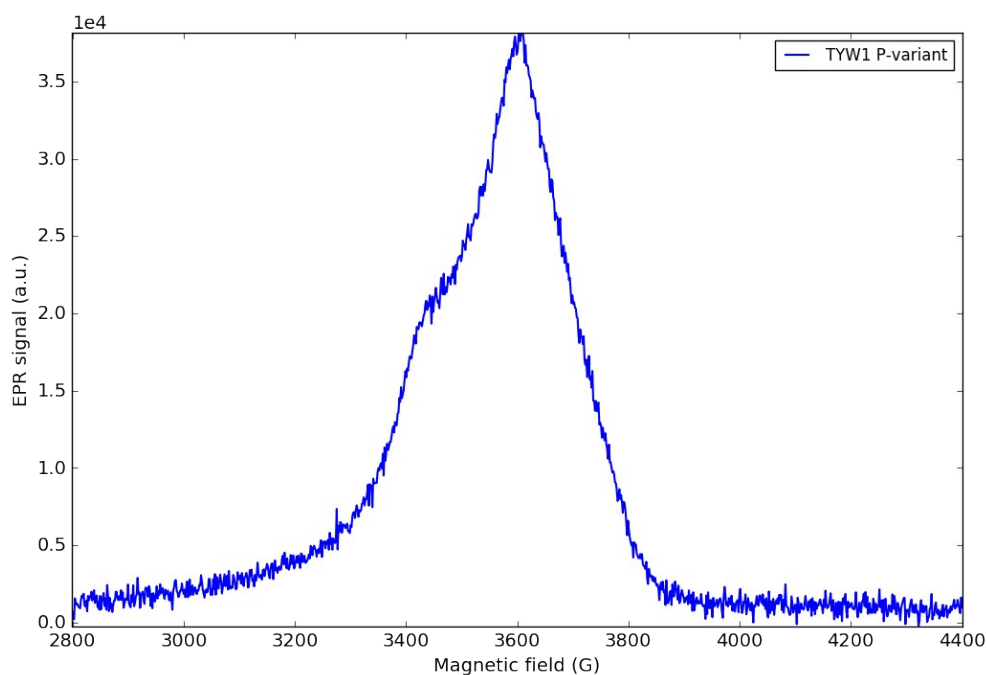

Figure 1: Two-pulse echo field-sweep spectrum of reduced TYW1-P variant (temperature 8 K,  $\pi/2$  pulse length 16 ns,  $\pi$  pulse length 32 ns,  $\tau$  value 200 ns, shot repetition rate 2 kHz, frequency 9.7171 GHz).

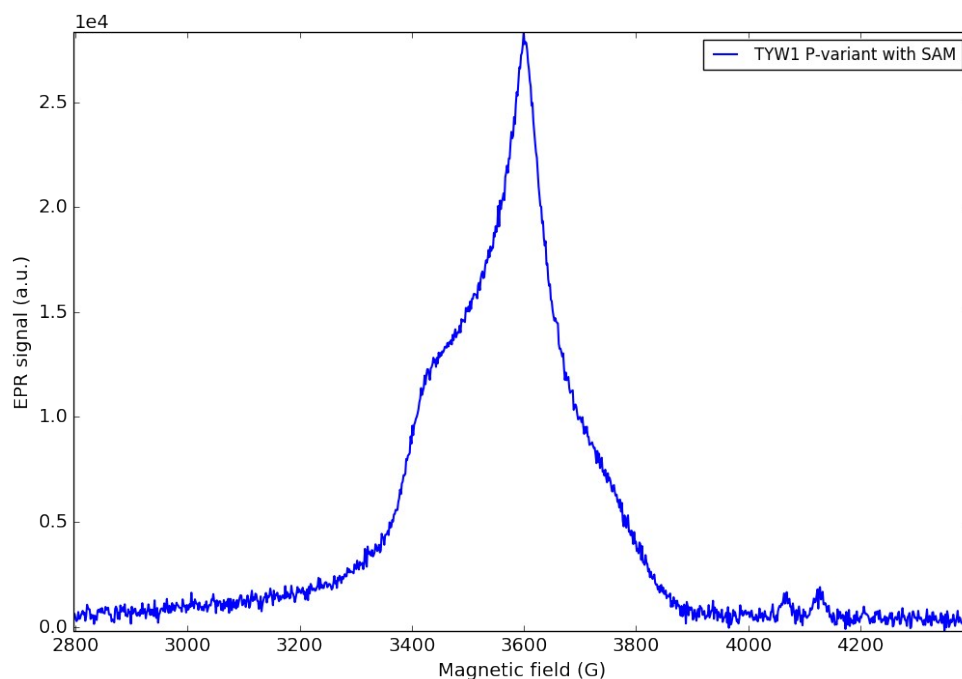

Figure 2: Two-pulse echo field-sweep spectrum of reduced TYW1-P variant treated with SAM solution (temperature 8 K,  $\pi/2$  pulse length 16 ns,  $\pi$  pulse length 32 ns,  $\tau$  value 200 ns, shot repetition rate 2 kHz, microwave frequency 9.7164 GHz).

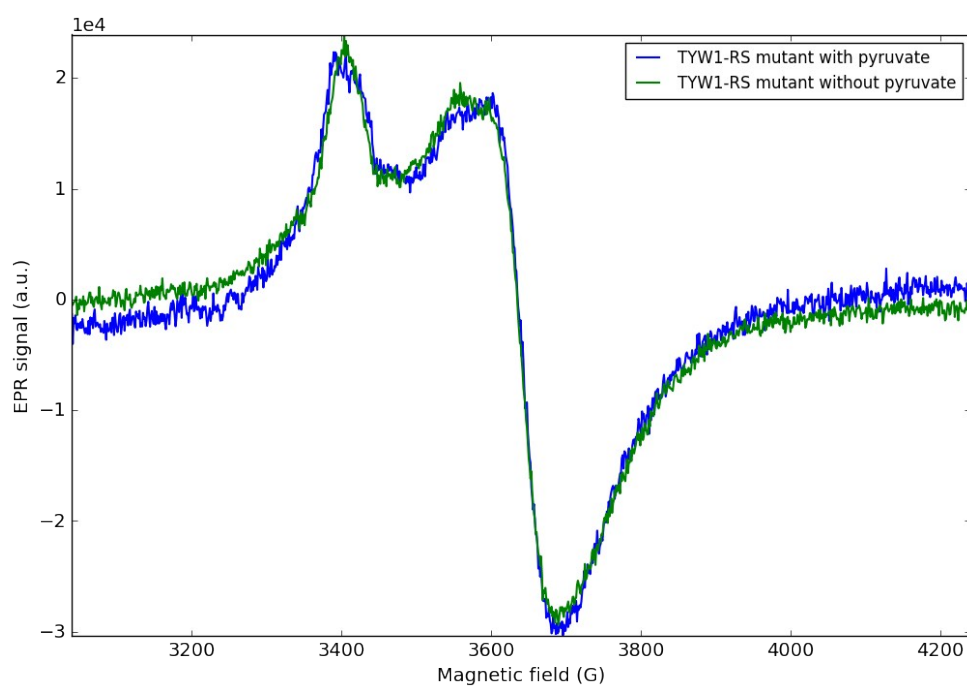

Figure 3: CW EPR spectrum of reduced TYW1-RS variant (green) and treated with pyruvate solution (blue). Temperature 8K, microwave power 0.8 mW, microwave frequency 9.65 GHz, modulation amplitude 5G.

| assignment                  | spectrum   | $\delta$<br>(mm/s) | $\Delta E_Q$<br>(mm/s) | %  |
|-----------------------------|------------|--------------------|------------------------|----|
| <b>Fe<sup>II</sup></b>      | Figure 1 D | 1.10               | 3.40                   | 15 |
|                             | Figure 1E  | 1.10               | 3.40                   | 11 |
|                             | Figure 1F  | 1.19               | 2.96                   | 40 |
|                             | Figure 5A  | 0.72               | 3.59                   | 13 |
| <b>Fe<sup>III</sup>-DTT</b> | Figure 5A  | 0.53               | 0.21                   | 18 |

**Table:** Mössbauer simulation parameters for quadrupole doublets assigned to species other than 4Fe4S clusters.
